# Supplementary material for: Effects of aprotic solvents on the physicochemical properties and ferric ion oxidation activity of iron-based ionic liquids
Source: Royal Society of Chemistry journal article supplement (doi:10.1039/d2cp03878a), 2023-01-01
Supplement: d2cp03878a1.pdf [file d2cp03878a1.pdf]

### Composition of BmimFeCl<sub>4</sub>

The elemental analyses are listed in Table S1. Wang<sup>4</sup> proved that BmimFeCl<sub>4</sub> shows strong Brønsted acid characteristics. However, there are free chloride ions in the iron-based ionic liquid. Therefore, we believe that a certain amount of hydrogen chloride combines with BmimFeCl<sub>4</sub> to form an iron-based ionic liquid by hydrogen bonding. The chemical formula of iron-based ionic liquid can be assigned as [BmimFeCl<sub>4</sub>][HCl]<sub>0.5</sub>. FTIR of Fe-IL shows that C-H stretching vibration peak on [Bmim]<sup>+</sup> appears at 3150-3000 cm<sup>-1</sup>, C-H symmetric and antisymmetric stretching vibration peak on alkyl chain appears at 2960-2850 cm<sup>-1</sup>, C=N stretching vibration peak on imidazole ring appears at 1590 cm<sup>-1</sup>, and C=C stretching vibration peak appears at 1165 cm<sup>-1</sup>. (Fig. S1) Referring to the previous work<sup>2</sup>, Raman spectrum showed that [FeCl<sub>4</sub>]<sup>-</sup> peak appears only at 333 cm<sup>-1</sup> in Fe-IL, and ESI-MS also showed that Fe<sup>3+</sup> exists only in the form of [FeCl<sub>4</sub>]<sup>-</sup>, while cations exist in the form of [Bmim]<sup>+</sup> in Fe-IL. In addition, iron-based ionic liquid shows significant hydrophobicity, and water content cannot be detected by the trace water analyser.

**Table S1** Elemental contents of [Bmim][FeCl<sub>4</sub>][HCl]<sub>0.5</sub>

| element                                      | Fe(cal.)/% | C(cal.)/%  | N(cal.)/% | H(cal.)/% |
|----------------------------------------------|------------|------------|-----------|-----------|
| [BmimFeCl <sub>4</sub> ][HCl] <sub>0.5</sub> | 14.4(15.7) | 26.2(27.0) | 8.6(7.9)  | 4.3(4.2)  |
| relative error                               | 0.08       | 0.03       | 0.09      | 0.02      |

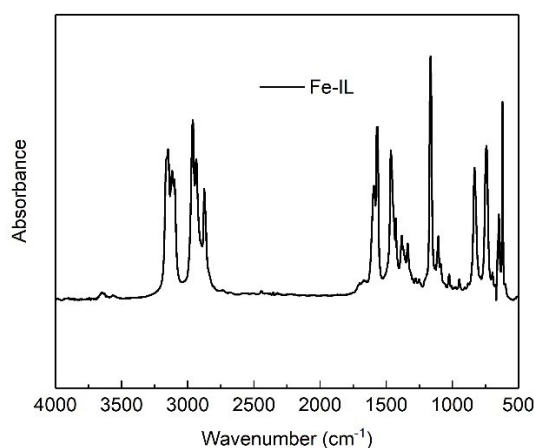

**Fig. S1** FTIR of BmimFeCl<sub>4</sub>

**Table S2** The densities of BmimFeCl<sub>4</sub>/DMAC and BmimFeCl<sub>4</sub>/NHD

| x                                                             | T(K)    |         |         |         |         |         |         |
|---------------------------------------------------------------|---------|---------|---------|---------|---------|---------|---------|
|                                                               | 293.2   | 298.2   | 303.2   | 308.2   | 313.2   | 318.2   | 323.2   |
| Density (g·cm <sup>-3</sup> ) for BmimFeCl <sub>4</sub> /DMAC |         |         |         |         |         |         |         |
| 1.0000                                                        | 1.37564 | 1.37142 | 1.36719 | 1.36299 | 1.35891 | 1.35464 | 1.35037 |
| 0.7940                                                        | 1.33842 | 1.33429 | 1.33003 | 1.32579 | 1.32172 | 1.31737 | 1.31317 |
| 0.5983                                                        | 1.28866 | 1.28453 | 1.28025 | 1.27603 | 1.27198 | 1.26757 | 1.26342 |
| 0.4007                                                        | 1.22132 | 1.21723 | 1.21289 | 1.20869 | 1.20465 | 1.20018 | 1.19605 |
| 0.2000                                                        | 1.11636 | 1.11243 | 1.10791 | 1.10374 | 1.09969 | 1.09506 | 1.09095 |
| 0.0000                                                        | 0.93930 | 0.93601 | 0.93082 | 0.92672 | 0.92266 | 0.91737 | 0.91386 |
| Density (g·cm <sup>-3</sup> ) for BmimFeCl <sub>4</sub> /NHD  |         |         |         |         |         |         |         |
| 1.0000                                                        | 1.37564 | 1.37142 | 1.36719 | 1.36299 | 1.35891 | 1.35464 | 1.35037 |
| 0.7946                                                        | 1.30515 | 1.30078 | 1.29629 | 1.29192 | 1.28768 | 1.28331 | 1.27894 |
| 0.5917                                                        | 1.24052 | 1.23636 | 1.23389 | 1.22973 | 1.22557 | 1.21974 | 1.21558 |
| 0.3928                                                        | 1.17532 | 1.17113 | 1.16694 | 1.16273 | 1.15854 | 1.15436 | 1.15017 |
| 0.1790                                                        | 1.10753 | 1.10321 | 1.09889 | 1.09456 | 1.09024 | 1.08593 | 1.08161 |
| 0.0000                                                        | 1.03293 | 1.02837 | 1.02381 | 1.01927 | 1.0147  | 1.01014 | 1.00558 |

x is the mole fraction of BmimFeCl<sub>4</sub> in composites.

**Table S3** The density fitting parameters of BmimFeCl<sub>4</sub>/DMAC and BmimFeCl<sub>4</sub>/NHD

| x                           | A     | B × 10 <sup>-4</sup> | R <sup>2</sup> | x                          | A     | B × 10 <sup>-4</sup> | R <sup>2</sup> |
|-----------------------------|-------|----------------------|----------------|----------------------------|-------|----------------------|----------------|
| BmimFeCl <sub>4</sub> /DMAC |       |                      |                | BmimFeCl <sub>4</sub> /NHD |       |                      |                |
| 1.0000                      | 1.622 | -8.403               | 1              | 1.0000                     | 1.621 | -8.403               | 0.999          |
| 0.7940                      | 1.585 | -8.421               | 1              | 0.7946                     | 1.560 | -8.727               | 0.999          |
| 0.5983                      | 1.536 | -8.422               | 0.999          | 0.5917                     | 1.484 | -8.312               | 0.989          |
| 0.4007                      | 1.469 | -8.439               | 0.999          | 0.3928                     | 1.421 | -8.385               | 1              |
| 0.2000                      | 1.366 | -8.513               | 0.999          | 0.1790                     | 1.360 | -8.640               | 1              |
| 0.0000                      | 1.195 | -8.697               | 0.997          | 0.0000                     | 1.300 | -9.115               | 1              |

x is the mole fraction of BmimFeCl<sub>4</sub> in composites.

**Table S4** Fitted parameters of RK equation and standard deviation ( $\sigma$ ) for two binary systems of BmimFeCl<sub>4</sub>/DMAC and BmimFeCl<sub>4</sub>/NHD

| T(K)                                  | 293.2  | 298.2  | 303.2  | 308.2  | 313.2  | 318.2  | 323.2  |
|---------------------------------------|--------|--------|--------|--------|--------|--------|--------|
| BmimFeCl <sub>4</sub> +DMAC           |        |        |        |        |        |        |        |
| V <sup>E</sup> (cm <sup>3</sup> /mol) |        |        |        |        |        |        |        |
| A <sub>0</sub>                        | -1.49  | -1.58  | -1.80  | -1.87  | -1.94  | -2.15  | -2.21  |
| A <sub>1</sub>                        | 0.43   | 0.44   | 0.65   | 0.71   | 0.78   | 1.02   | 1.10   |
| A <sub>2</sub>                        | 0.08   | 0.08   | 0.10   | 0.05   | 0.10   | 0.09   | 0.02   |
| $\sigma$                              | 0.07   | 0.07   | 0.09   | 0.10   | 0.11   | 0.14   | 0.15   |
| $\Delta\eta$ (mPa·s)                  |        |        |        |        |        |        |        |
| A <sub>0</sub>                        | -19.42 | -15.37 | -11.67 | -8.09  | -5.73  | -4.09  | -2.93  |
| A <sub>1</sub>                        | 2.29   | 1.88   | 1.82   | 1.73   | 2.06   | 1.41   | 1.03   |
| A <sub>2</sub>                        | -3.07  | -1.37  | -1.27  | -3.19  | -2.55  | -2.44  | -2.47  |
| $\sigma$                              | 0.07   | 0.04   | 0.02   | 0.02   | 0.01   | 0.01   | 0.02   |
| BmimFeCl <sub>4</sub> +NHD            |        |        |        |        |        |        |        |
| V <sup>E</sup> (cm <sup>3</sup> /mol) |        |        |        |        |        |        |        |
| A <sub>0</sub>                        | -10.55 | -11.03 | -11.55 | -12.05 | -12.49 | -12.93 | -13.38 |
| A <sub>1</sub>                        | 13.33  | 13.45  | 13.56  | 13.76  | 13.97  | 14.14  | 14.38  |
| A <sub>2</sub>                        | -17.13 | -17.23 | -17.20 | -17.01 | -17.25 | -17.58 | -17.77 |
| $\sigma$                              | 0.17   | 0.18   | 0.19   | 0.20   | 0.20   | 0.20   | 0.21   |
| $\Delta\eta$ (mPa·s)                  |        |        |        |        |        |        |        |
| A <sub>0</sub>                        | 27.35  | 23.69  | 18.60  | 14.47  | 12.51  | 9.88   | 8.08   |
| A <sub>1</sub>                        | 2.38   | 5.98   | 6.01   | 5.04   | 5.23   | 4.99   | 3.86   |
| A <sub>2</sub>                        | -32.62 | -30.93 | -24.13 | -18.40 | -15.51 | -11.90 | -10.11 |
| $\sigma$                              | 0.50   | 0.50   | 0.42   | 0.33   | 0.27   | 0.19   | 0.20   |

**Table S5** The excess molar volume of BmimFeCl<sub>4</sub>/DMAC composites

| T(K)  | x      |        |        |        |        |        |
|-------|--------|--------|--------|--------|--------|--------|
|       | 1.0000 | 0.7940 | 0.5983 | 0.4007 | 0.2000 | 0.0000 |
| 293.2 | 0.000  | -0.280 | -0.345 | -0.396 | -0.353 | 0.000  |
| 298.2 | 0.000  | -0.296 | -0.367 | -0.419 | -0.371 | 0.000  |
| 303.2 | 0.000  | -0.321 | -0.408 | -0.484 | -0.435 | 0.000  |
| 308.2 | 0.000  | -0.323 | -0.427 | -0.500 | -0.451 | 0.000  |
| 313.2 | 0.000  | -0.334 | -0.438 | -0.526 | -0.473 | 0.000  |
| 318.2 | 0.000  | -0.354 | -0.479 | -0.587 | -0.538 | 0.000  |
| 323.2 | 0.000  | -0.360 | -0.495 | -0.602 | -0.565 | 0.000  |

x is the mole fraction of BmimFeCl<sub>4</sub> in composites.

**Table S6** The excess molar volume of BmimFeCl<sub>4</sub>/NHD composites

| T(K)  | x      |        |        |        |        |        |
|-------|--------|--------|--------|--------|--------|--------|
|       | 1.0000 | 0.7946 | 0.5917 | 0.3928 | 0.1790 | 0.0000 |
| 293.2 | 0.000  | -1.282 | -2.358 | -3.127 | -3.977 | 0.000  |
| 298.2 | 0.000  | -1.348 | -2.483 | -3.235 | -4.071 | 0.000  |
| 303.2 | 0.000  | -1.411 | -2.624 | -3.345 | -4.167 | 0.000  |
| 308.2 | 0.000  | -1.452 | -2.757 | -3.452 | -4.259 | 0.000  |
| 313.2 | 0.000  | -1.515 | -2.859 | -3.567 | -4.360 | 0.000  |
| 318.2 | 0.000  | -1.589 | -2.963 | -3.683 | -4.462 | 0.000  |
| 323.2 | 0.000  | -1.647 | -3.065 | -3.800 | -4.564 | 0.000  |

x is the mole fraction of BmimFeCl<sub>4</sub> in composites.

**Table S7** The viscosities of BmimFeCl<sub>4</sub>/DMAC and BmimFeCl<sub>4</sub>/NHD composites

| $\omega$                                          | T(K)  |       |       |       |       |       |       |
|---------------------------------------------------|-------|-------|-------|-------|-------|-------|-------|
|                                                   | 293.2 | 298.2 | 303.2 | 308.2 | 313.2 | 318.2 | 323.2 |
| Viscosity (mPa·s) for BmimFeCl <sub>4</sub> /DMAC |       |       |       |       |       |       |       |
| 1.0                                               | 30.82 | 26.01 | 21.89 | 18.52 | 16.58 | 14.50 | 12.70 |
| 0.9002                                            | 18.21 | 15.43 | 13.40 | 11.70 | 10.22 | 8.93  | 7.71  |
| 0.6993                                            | 8.67  | 7.54  | 6.45  | 5.79  | 5.25  | 4.72  | 4.22  |
| 0.5012                                            | 3.73  | 3.47  | 3.22  | 2.98  | 2.77  | 2.56  | 2.37  |
| 0.3002                                            | 2.13  | 1.95  | 1.87  | 1.76  | 1.67  | 1.57  | 1.49  |
| 0.0996                                            | 1.47  | 1.39  | 1.32  | 1.26  | 1.2   | 1.18  | 1.16  |
| 0.0000                                            | 1.16  | 1.11  | 1.08  | 1.07  | 1.06  | 1.03  | 1.02  |
| Viscosity (mPa·s) for BmimFeCl <sub>4</sub> /NHD  |       |       |       |       |       |       |       |
| 0.9021                                            | 29.32 | 25.10 | 21.11 | 17.80 | 16.02 | 13.95 | 12.20 |
| 0.7008                                            | 27.19 | 23.48 | 19.72 | 16.53 | 14.81 | 12.95 | 11.11 |
| 0.4996                                            | 24.50 | 21.12 | 17.61 | 14.63 | 12.90 | 11.01 | 9.63  |
| 0.3001                                            | 15.32 | 12.60 | 10.40 | 8.84  | 7.34  | 6.81  | 6.29  |
| 0.1000                                            | 8.58  | 7.36  | 6.49  | 5.71  | 5.04  | 4.54  | 4.10  |
| 0.0000                                            | 6.08  | 5.66  | 5.12  | 4.46  | 3.96  | 3.62  | 3.26  |

$\omega$  is the mass fraction of BmimFeCl<sub>4</sub> in composites.

**Table S8** The viscosity fitting parameters of BmimFeCl<sub>4</sub>/DMAC and BmimFeCl<sub>4</sub>/NHD

| $\omega$                    | $\eta_{\infty}(\text{mPa}\cdot\text{s})$ | $E_a(\text{KJ}\cdot\text{mol})$ | $R^2$ |
|-----------------------------|------------------------------------------|---------------------------------|-------|
| BmimFeCl <sub>4</sub> /DMAC |                                          |                                 |       |
| 1.0000                      | 0.0019                                   | 23.619                          | 0.997 |
| 0.9002                      | 0.0021                                   | 22.136                          | 0.999 |
| 0.6993                      | 0.0035                                   | 18.991                          | 0.996 |
| 0.5012                      | 0.0297                                   | 11.799                          | 0.998 |
| 0.3002                      | 0.0497                                   | 9.137                           | 0.998 |
| 0.0996                      | 0.0992                                   | 6.542                           | 0.994 |
| 0.0000                      | 0.3117                                   | 3.168                           | 0.944 |
| BmimFeCl <sub>4</sub> /NHD  |                                          |                                 |       |
| 1.0000                      | 0.0019                                   | 23.619                          | 0.997 |
| 0.9021                      | 0.0020                                   | 23.368                          | 0.998 |
| 0.7008                      | 0.0017                                   | 23.675                          | 0.997 |
| 0.4996                      | 0.0009                                   | 24.952                          | 0.998 |
| 0.3001                      | 0.0005                                   | 25.382                          | 0.989 |
| 0.1000                      | 0.0027                                   | 19.635                          | 0.998 |
| 0.0000                      | 0.0067                                   | 16.639                          | 0.990 |

$\omega$  is the mass fraction of BmimFeCl<sub>4</sub> in composites.

**Table S9** The viscosity deviation of BmimFeCl<sub>4</sub>/DMAC composites

| T(K)  | x      |        |        |        |        |        |        |
|-------|--------|--------|--------|--------|--------|--------|--------|
|       | 1.0000 | 0.6995 | 0.3763 | 0.2055 | 0.0998 | 0.0279 | 0.0000 |
| 293.2 | 0.00   | -3.99  | -4.74  | -3.52  | -2.19  | -0.52  | 0.00   |
| 298.2 | 0.00   | -3.12  | -3.74  | -2.75  | -1.64  | -0.42  | 0.00   |
| 303.2 | 0.00   | -2.34  | -2.87  | -2.14  | -1.29  | -0.34  | 0.00   |
| 308.2 | 0.00   | -1.66  | -2.04  | -1.67  | -1.05  | -0.30  | 0.00   |
| 313.2 | 0.00   | -1.12  | -1.50  | -1.28  | -0.81  | -0.26  | 0.00   |
| 318.2 | 0.00   | -0.82  | -1.08  | -0.94  | -0.60  | -0.23  | 0.00   |
| 323.2 | 0.00   | -0.61  | -0.80  | -0.69  | -0.50  | -0.19  | 0.00   |

x is the mole fraction of BmimFeCl<sub>4</sub> in composites.

**Table S10** The viscosity deviation of BmimFeCl<sub>4</sub>/NHD composites

| T(K)  | x      |        |        |        |        |        |        |
|-------|--------|--------|--------|--------|--------|--------|--------|
|       | 1.0000 | 0.8783 | 0.6516 | 0.4449 | 0.2557 | 0.0818 | 0.0000 |
| 293.2 | 0.00   | 1.51   | 5.01   | 7.42   | 2.90   | 0.48   | 0.00   |
| 298.2 | 0.00   | 1.41   | 4.59   | 6.39   | 1.84   | 0.24   | 0.00   |
| 303.2 | 0.00   | 1.25   | 3.65   | 5.03   | 1.30   | 0.12   | 0.00   |
| 308.2 | 0.00   | 1.01   | 2.89   | 3.89   | 0.99   | 0.10   | 0.00   |
| 313.2 | 0.00   | 0.94   | 2.60   | 3.32   | 0.79   | 0.08   | 0.00   |
| 318.2 | 0.00   | 0.78   | 2.19   | 2.55   | 0.56   | 0.06   | 0.00   |
| 323.2 | 0.00   | 0.65   | 1.69   | 2.17   | 0.42   | 0.05   | 0.00   |

x is the mole fraction of BmimFeCl<sub>4</sub> in composites.

**Table S11** The redox peak potentials and conductivities of different systems

| Systems    | x   | E <sub>A</sub> (mV) | I <sub>A</sub> (mA/cm <sup>2</sup> ) | E <sub>C</sub> (mV) | I <sub>C</sub> (mA/cm <sup>2</sup> ) | E <sub>A</sub> -E <sub>C</sub> (mV) | I <sub>A</sub> /I <sub>C</sub> | σ (μS/cm) |
|------------|-----|---------------------|--------------------------------------|---------------------|--------------------------------------|-------------------------------------|--------------------------------|-----------|
| Fe-IL/DMAC | 0.2 | 473.8               | 2.589                                | -259.8              | 2.785                                | 733.6                               | 0.930                          | 1599      |
|            | 0.4 | 593.9               | 2.259                                | -168.4              | 2.163                                | 762.3                               | 1.044                          | 1126      |
|            | 0.6 | 717.4               | 1.874                                | -201.1              | 1.697                                | 918.5                               | 1.104                          | 866       |
|            | 0.8 | 746.6               | 1.768                                | -210.3              | 1.580                                | 956.9                               | 1.119                          | 803       |
| Fe-IL/NHD  | 0.2 | 319.9               | 0.879                                | -534.2              | 0.822                                | 854.1                               | 1.069                          | 337       |
|            | 0.4 | 633.7               | 1.287                                | -225.6              | 1.106                                | 859.3                               | 1.164                          | 407       |
|            | 0.6 | 712.2               | 1.565                                | -203.3              | 1.303                                | 915.5                               | 1.201                          | 443       |
|            | 0.8 | 718.0               | 1.909                                | -181.1              | 1.604                                | 899.1                               | 1.190                          | 573       |
| Pure Fe-IL | 1.0 | 644.6               | 1.885                                | -113.3              | 1.627                                | 757.9                               | 1.159                          | 736       |

x is the mole fraction of BmimFeCl<sub>4</sub> in composites.
